# Supplementary material
Source: ML conference proceedings conference paper supplement (https://openaccess.thecvf.com/content/cvpr_2015/html/Khan_Shape-Tailored_Local_Descriptors_2015_CVPR_paper.html)
Supplement: Supplementary file 1 [file Khan_Shape-Tailored_Local_Descriptors_2015_CVPR_supplemental.zip]

Archive with 5 entries (5 files):
- 0780-supp/0780-supp.pdf
- 0780-supp/Fig2.mp4
- 0780-supp/Fig6_cheetah.mp4
- 0780-supp/Fig6_greenfish.mp4
- 0780-supp/Fig6_turtle.mp4
